# Supplementary material for: Seismicity related to the eastern sector of Anatolian escape tectonic: the example of the 24 January 2020 Mw 6.77 Elazığ-Sivrice earthquake
Source: Copernicus journal article supplement (doi:10.5194/se-2020-55), 2020-05-04
Supplement: Supplementary file 1 [file se-2020-55-supplement.pdf]

**Data overview and local velocity models:**

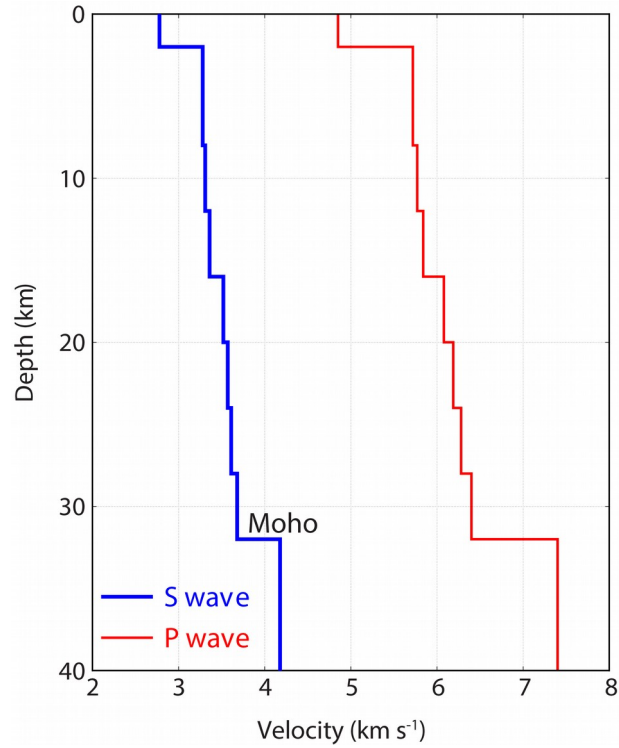

Figure S1. The velocity model for calculating near-field Green's functions.

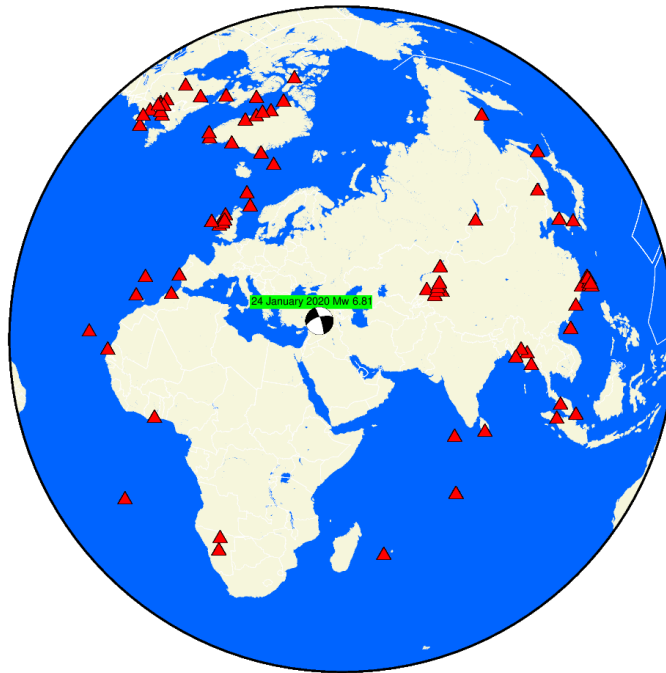

Figure S2. Distribution of 76 teleseismic broadband stations at distances of 30-80 degrees (red triangles). Focal mechanism of the 24 January 2020 Mw 6.8 Elazığ-Sivrice earthquake. The mechanism coordinate denotes the epicenter.

### Wrapped and unwrapped interferograms of the InSAR data:

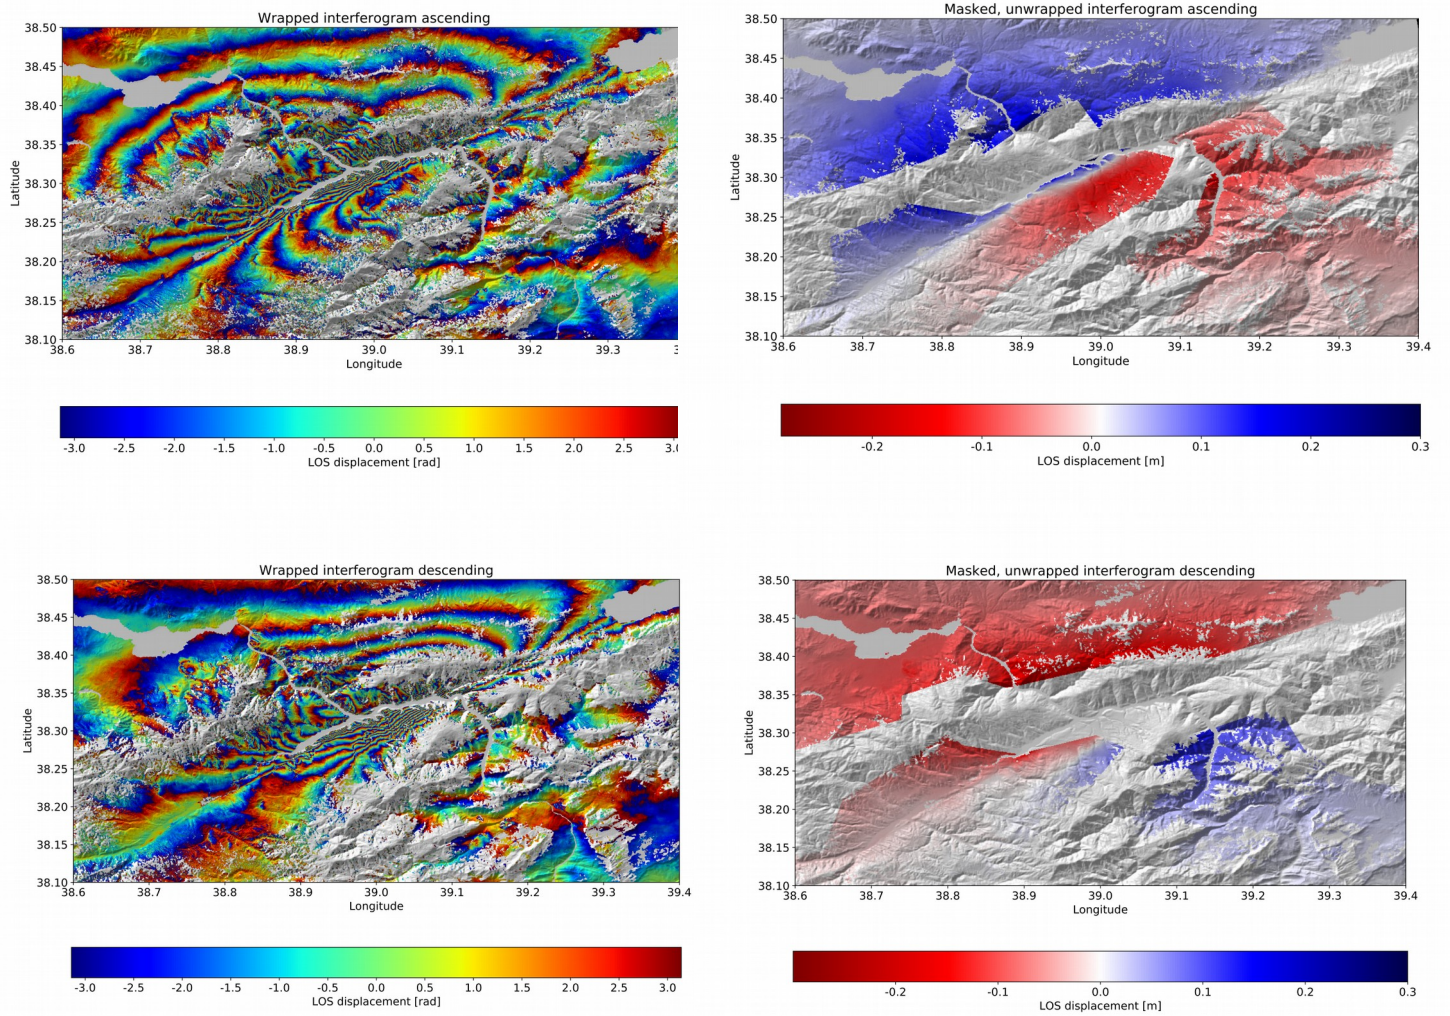

Figure S3. Wrapped (right) and unwrapped (left) interferograms spanning the co-seismic of the Elaziğ-Sivrice earthquake for both ascending (up) and descending (down) directions.

**Additional evidences for the rupture directivity and regional broadband stations:**

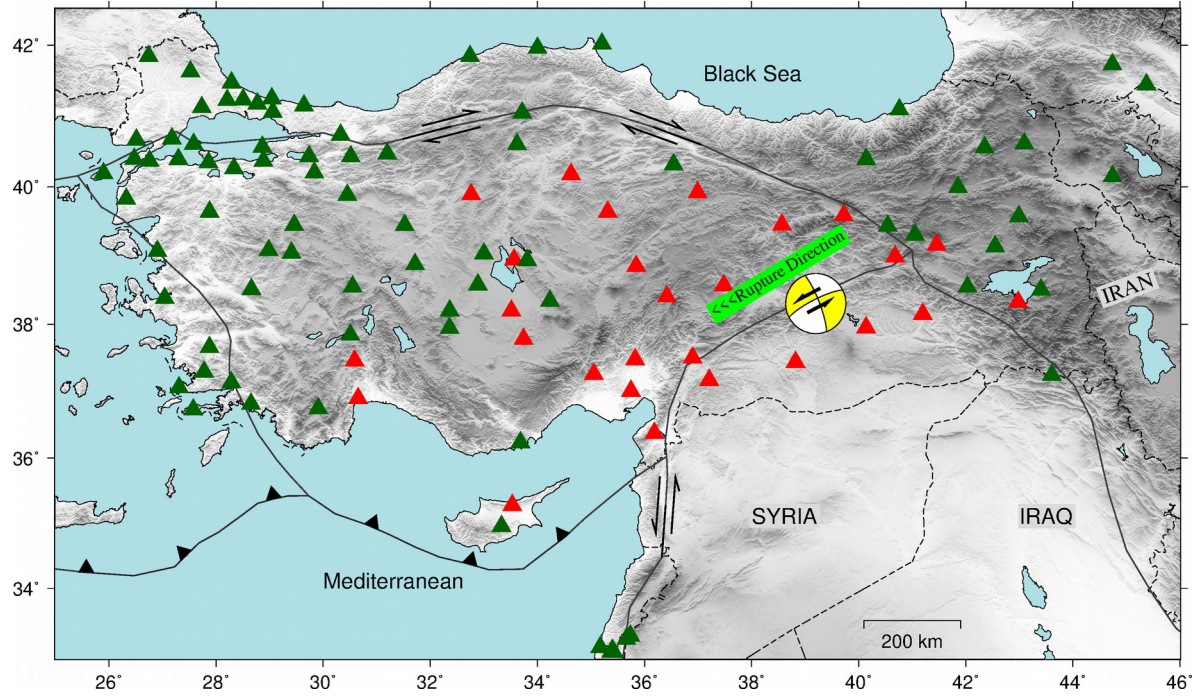

Figure S4. Regional broadband seismic stations of the KOERI and GEOFON networks (triangles) used in this study for the estimation of foreshocks and aftershocks of the Elazığ-Sivrice earthquake, with the observed spatial distribution of saturated seismic stations (red stations). Higher amplitudes have been recorded at stations in the direction of rupture.

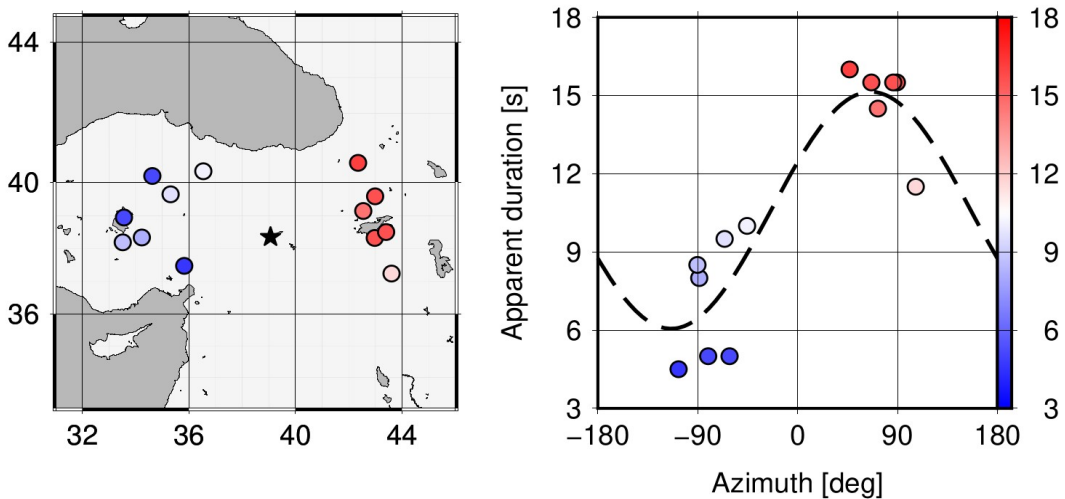

Figure S5. Mainshock apparent rupture duration at regional seismic stations. (left) color-coded in map view and (right) as a function of azimuth. The blue circles which indicate stations in the front of rupture direction, show less apparent duration than those are located in backward of the rupture direction (red circles).

Additional information for the Coulomb failure stress change analysis:

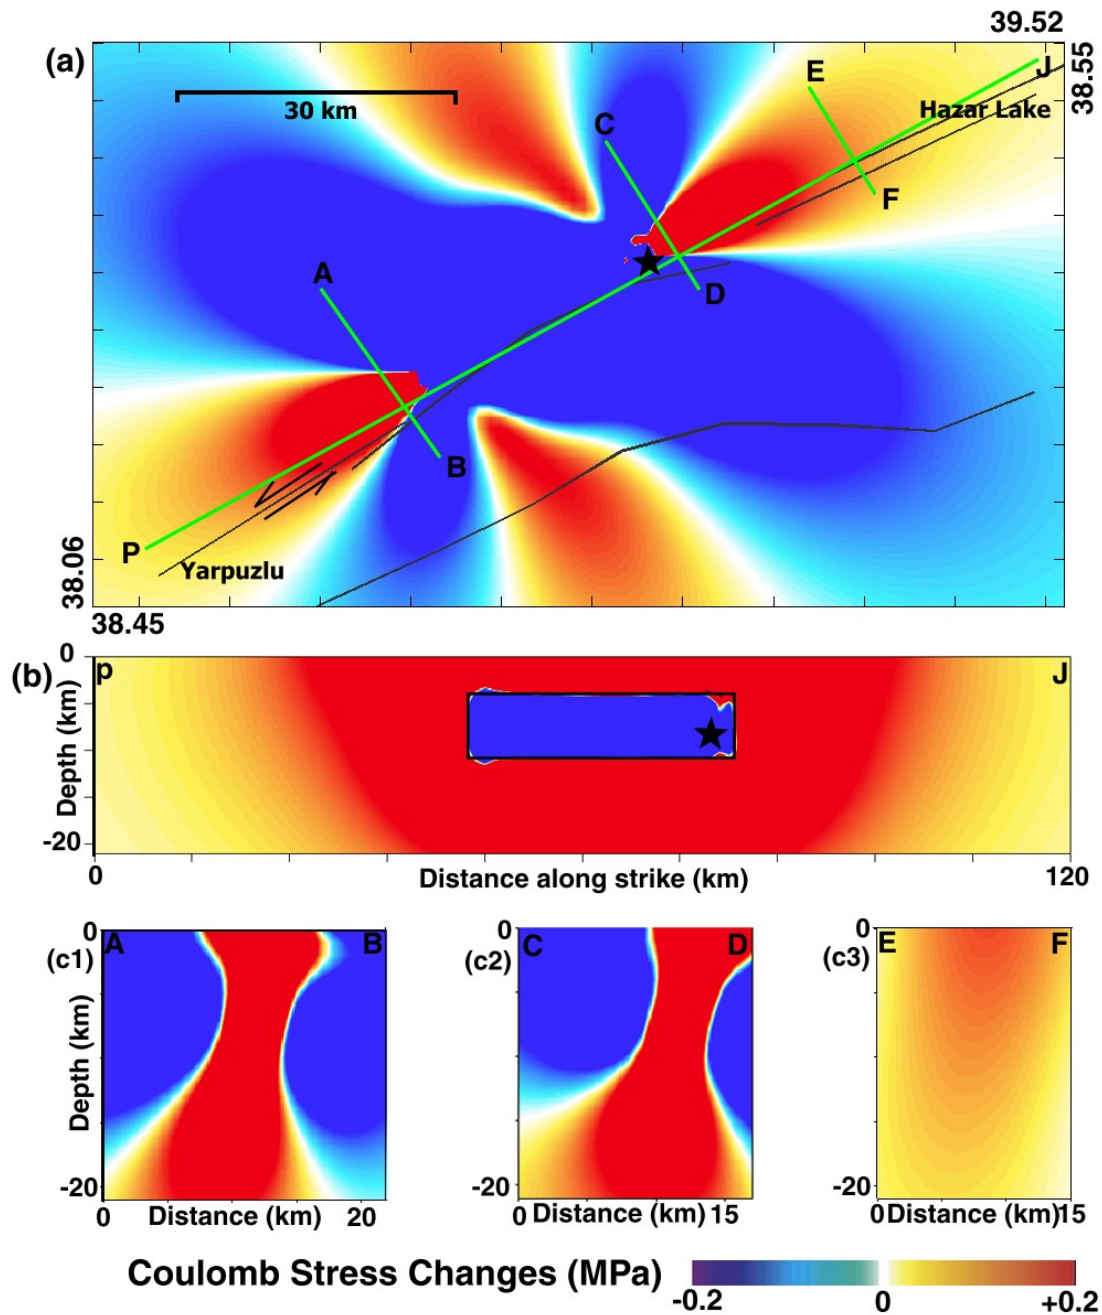

Figure S6. This figure has the same style as Fig. 3.

a) The imparted stress change caused by 24 January 2020 Elazığ-Sivrice earthquake on the surrounding area. Black stars denote the mainshock epicenter and black lines show the main faults in this region (Basili et al., 2013). b) Stress changes on the fault plane along strike (PJ profile). Rectangular shows the main ruptured area. c1, c2, c3) Stress changes on the fault plane along down-dip in 3 different profiles: AB, CD and EF.

**Additional information of the moment tensor inversion (mainshock):** The figure captions are modified from automated figure generations in the Grond software toolbox (Heimann et al., 2018).

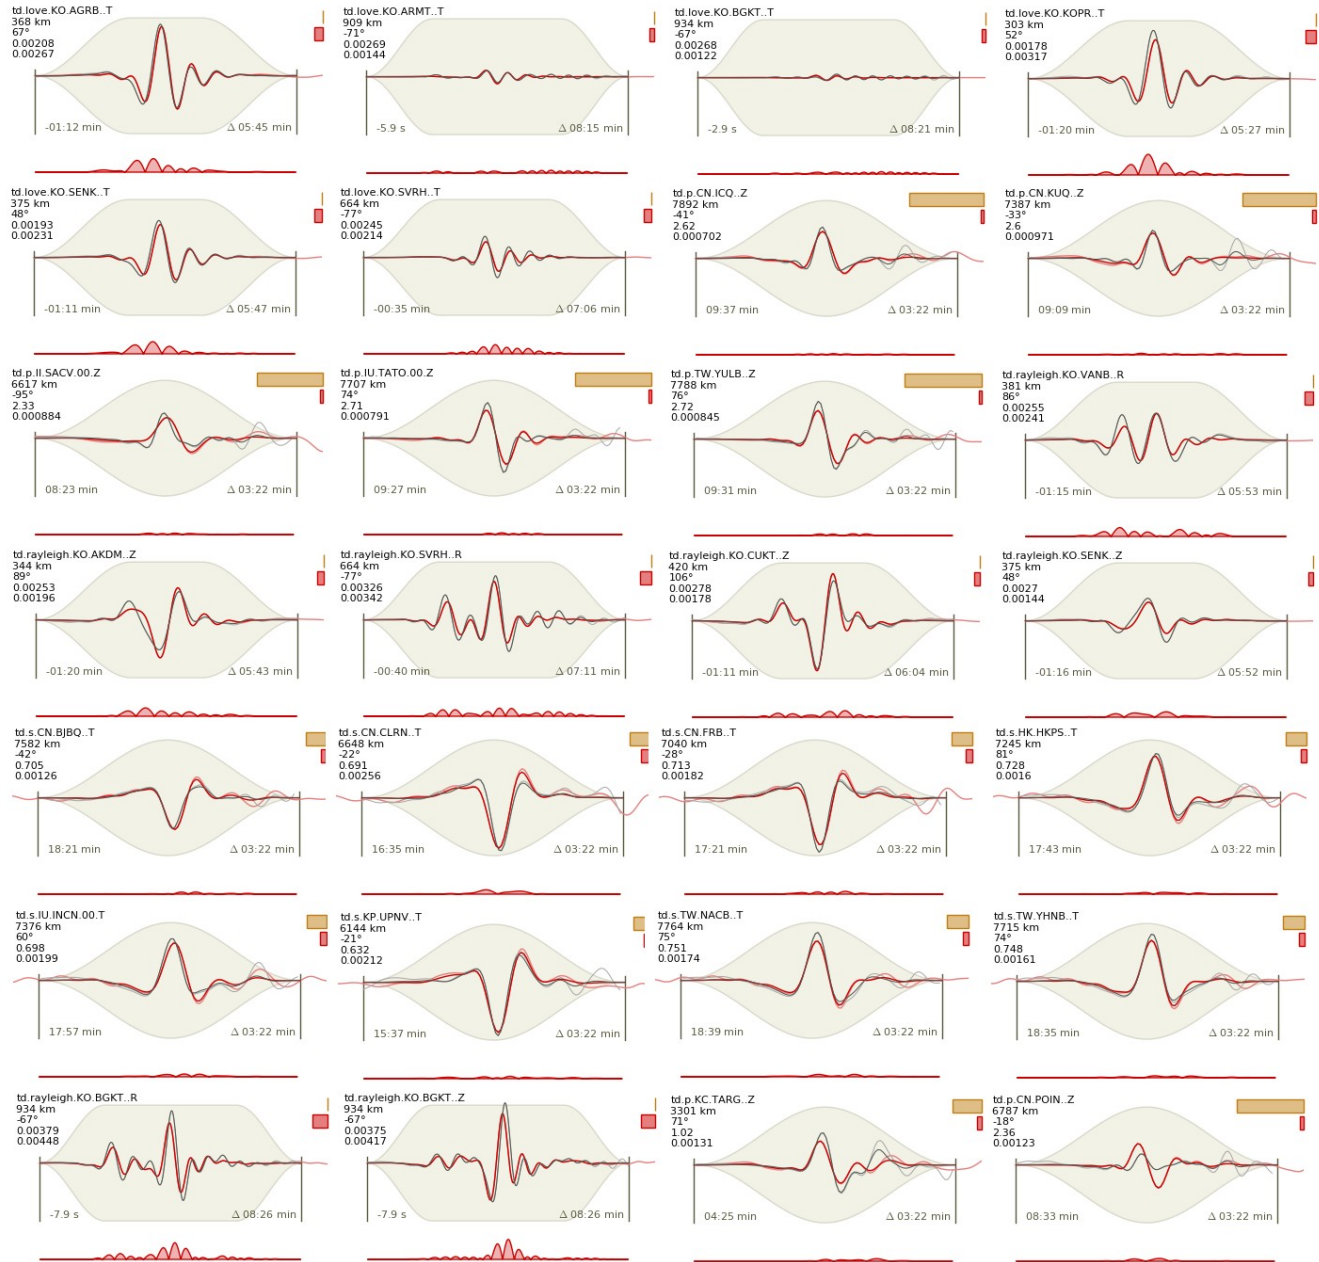

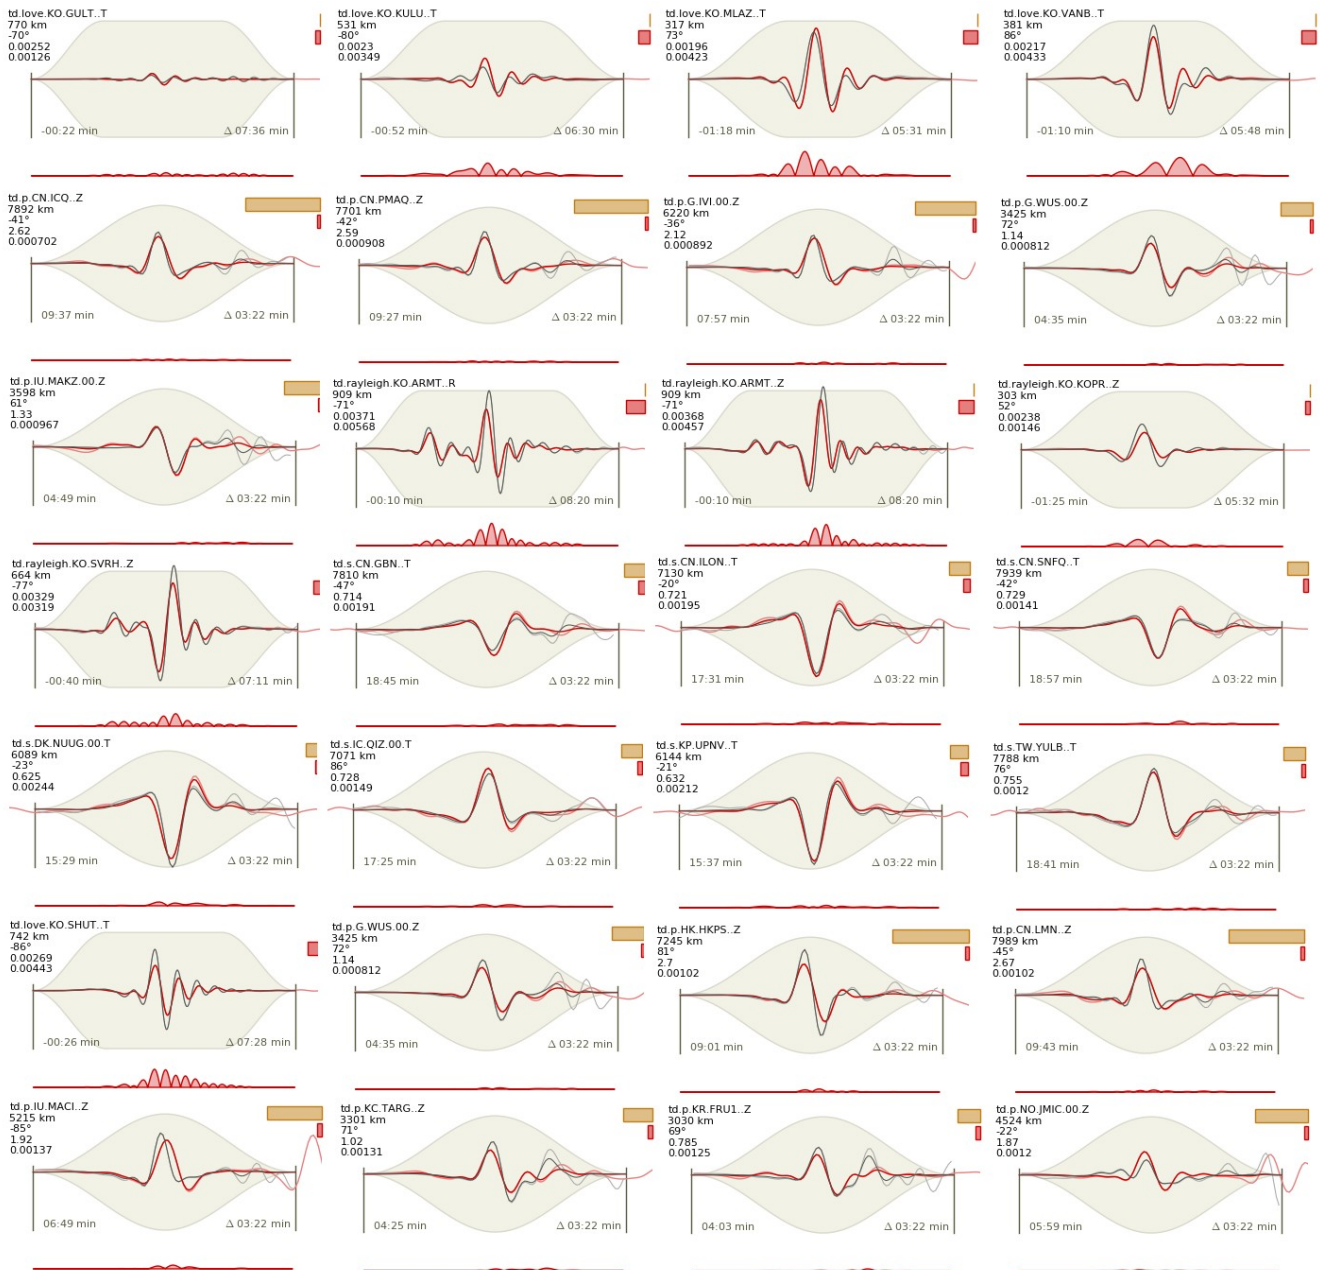

Figure S7. Time domain waveform fits for some selected traces for the best model in teleseismic (P and SH waves: tp.p and td.s) and regional (Rayleigh and Love waves: rd.rayleigh and td.love).

Information (left side, from top to bottom) gives station name with component, distance to source, azimuth of station with respect to source, weight, misfit and starting time of the waveform relative to the origin time. The background gray area shows the applied taper function. The waveforms shown are: the restituted and filtered observed trace (dark gray), the synthetic trace (red). The traces are scaled according to the weight (small weight, small amplitude). Colored boxes on the upper right: Top box (orange) show the relative weight within the entire dataset of the optimization and bottom box (red) the relative misfit contribution to the global misfit of the optimization.

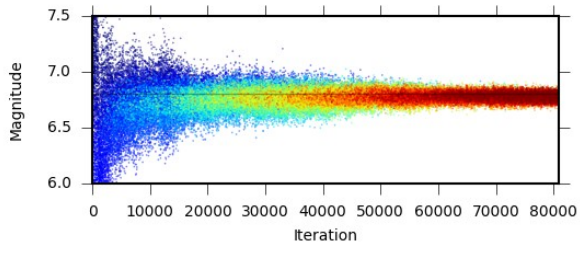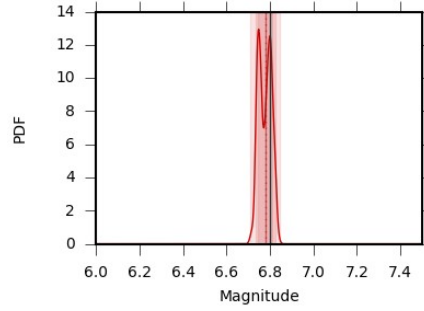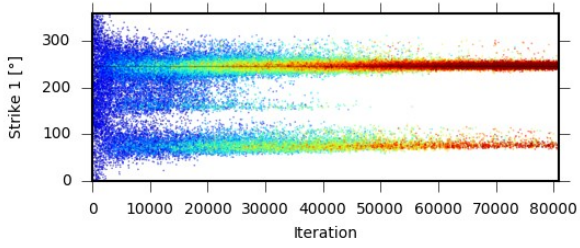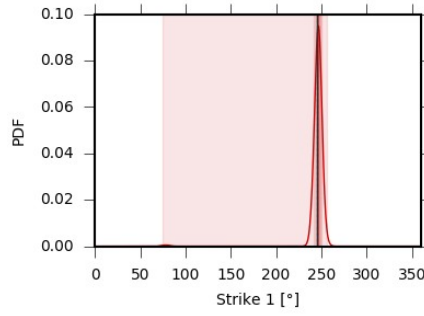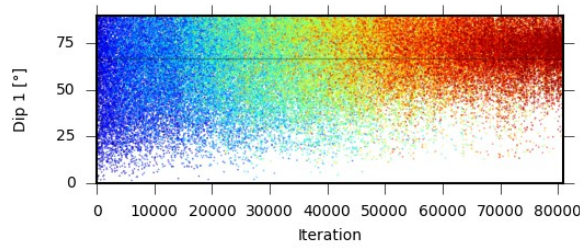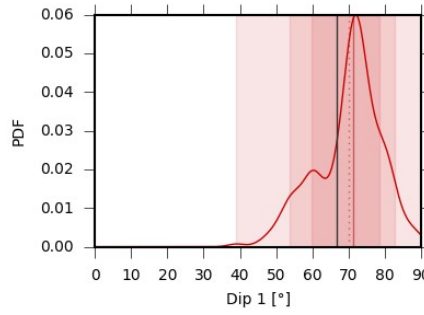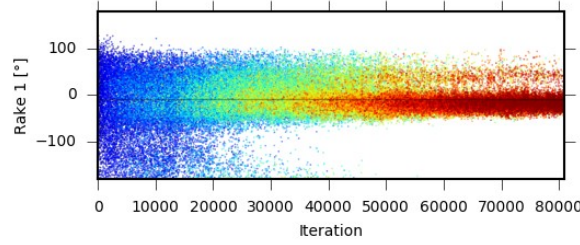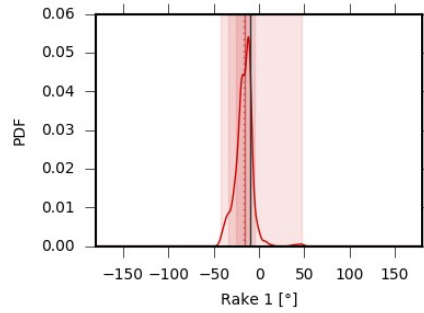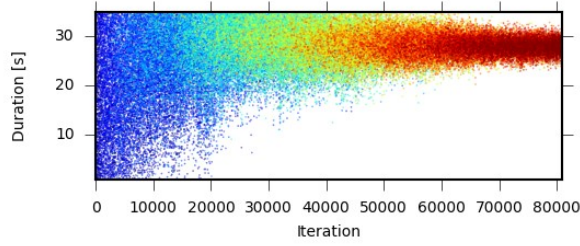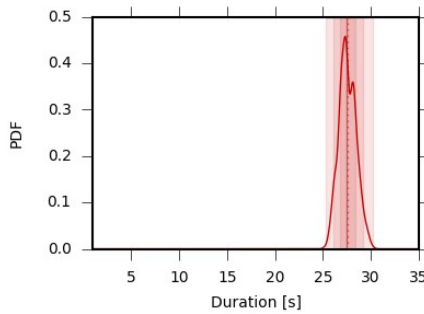

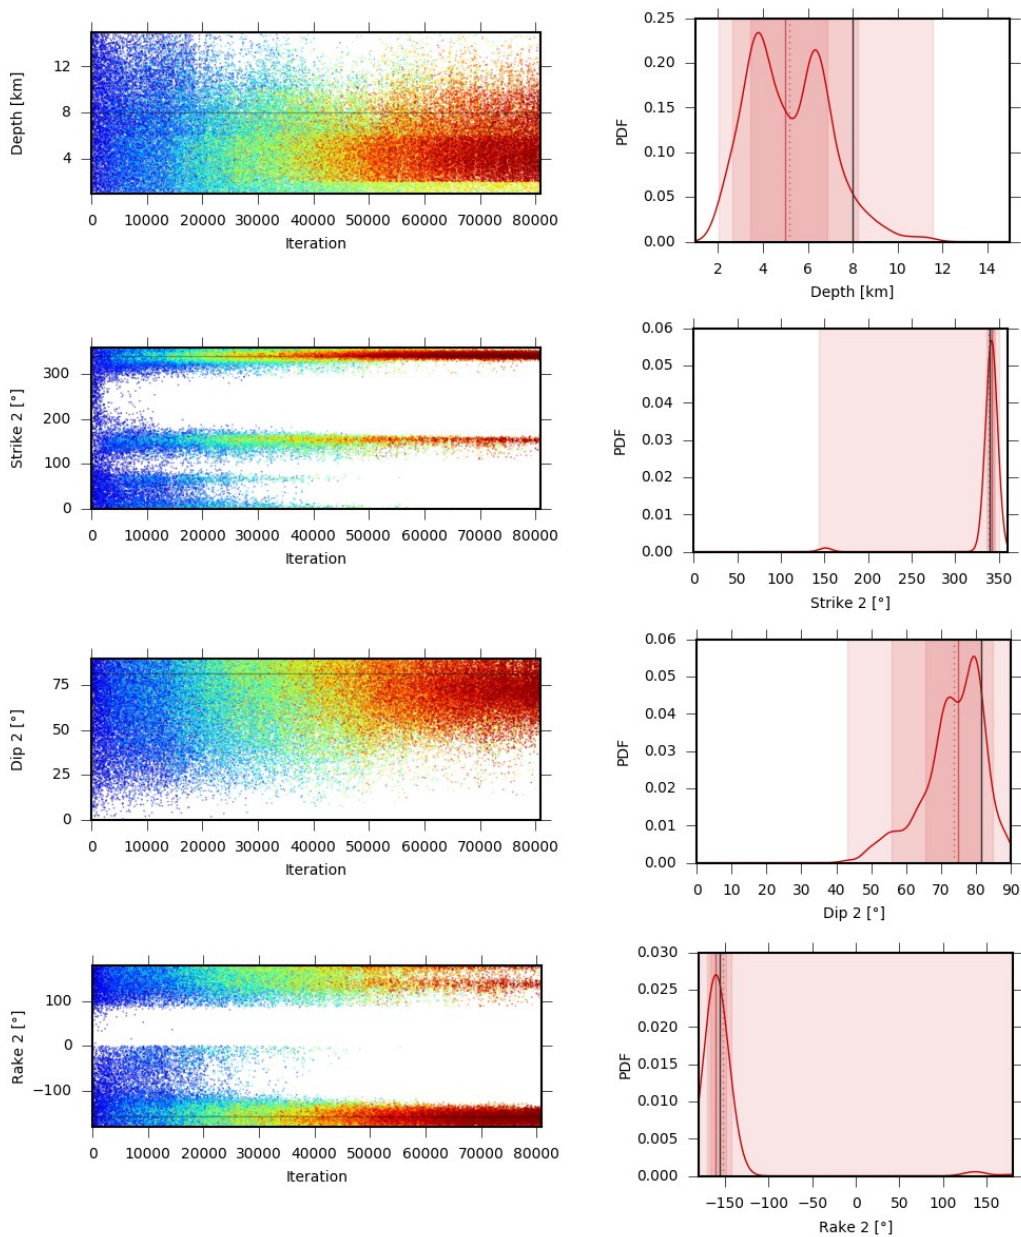

Figure S8. Sequence plot, distribution and uncertainties of the some source parameters (Depth, dips, rakes, strikes, duration and magnitude). Left: The visited parameter values during the optimization is shown. The color shows the relative misfit. Relatively high misfits are in blue colors and relatively low misfits in red. Right: The histograms show Gaussian kernel densities (red curved solid line) of the model parameters (marginals) along with some characteristics: The red solid vertical line gives the median of the distribution and the dashed red vertical line the mean value. Dark gray vertical lines show reference parameter (GCMT solution). The overlapping red-shaded areas show the 68% confidence intervals (innermost area), the 90% confidence intervals (middle area) and the minimum and maximum values (widest area). The plot ranges are defined by the given parameter bounds and show the model space.



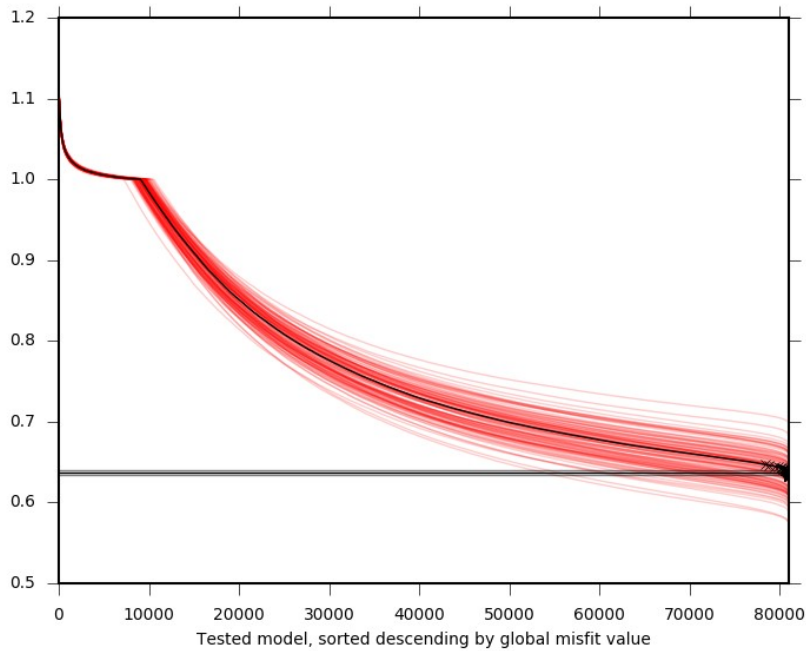

Figure S9. Bootstrap misfit of the optimization in 95000 iterations. For each bootstrap configuration, all models are sorted according to their misfit value (red lines) and their global misfit value (black line). The best model of every bootstrap configuration (right end model of red lines) is marked as a cross in the global misfit configuration.

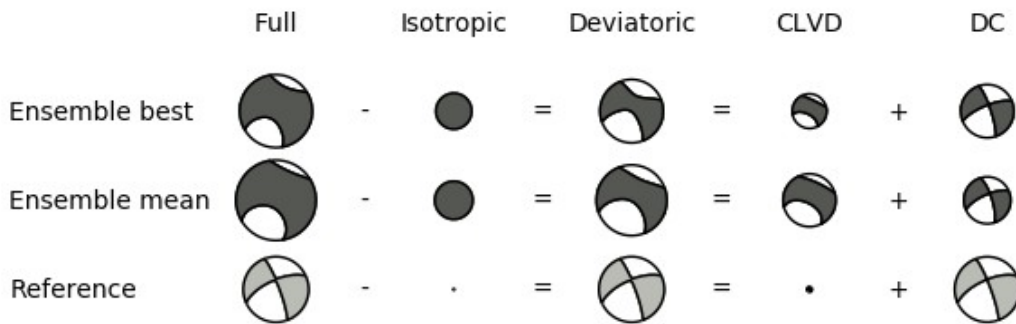

Figure S10. Moment tensor decomposition of the best and mean fitting solution into isotropic, deviatoric and best double couple components. Shown are the ensemble best, the ensemble mean and, a reference mechanism (GCMT). The symbol size indicates the relative strength of the components. Relatively large positive isotropic and negative compensated linear vector dipole (CLVD) components are shown in the moment tensor decomposition. However, to verify and understand the context of the isotropic and CLVD component of the source mechanism requires further investigations, which are beyond the scope of this work.

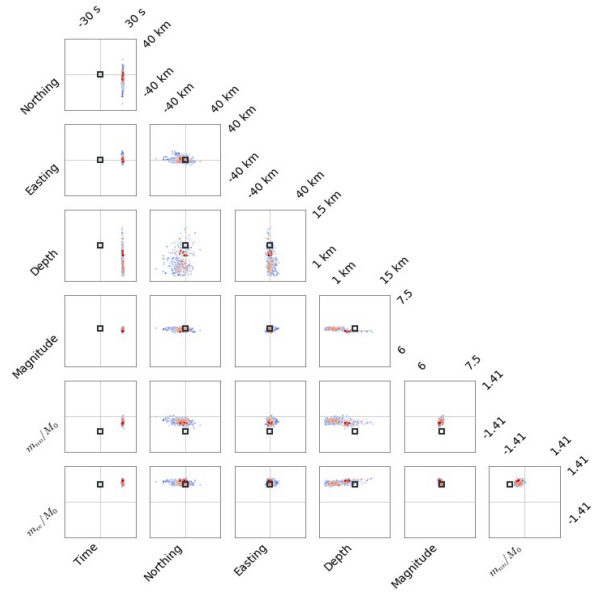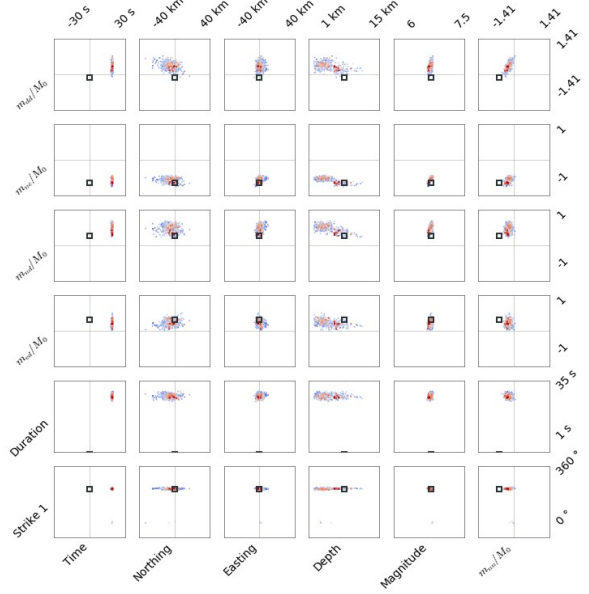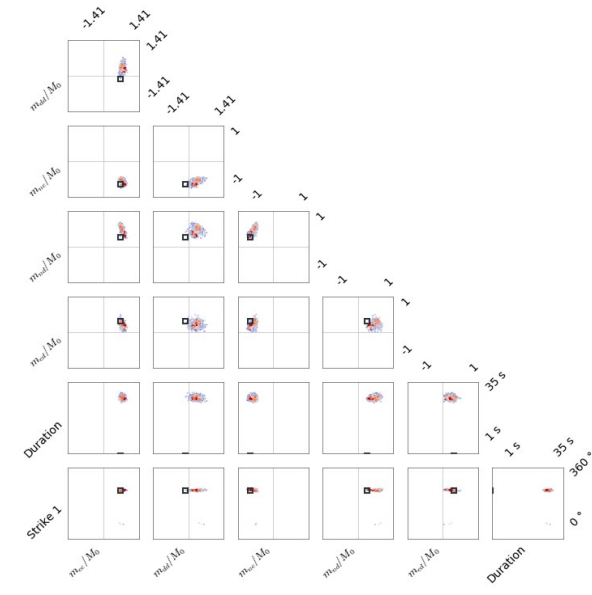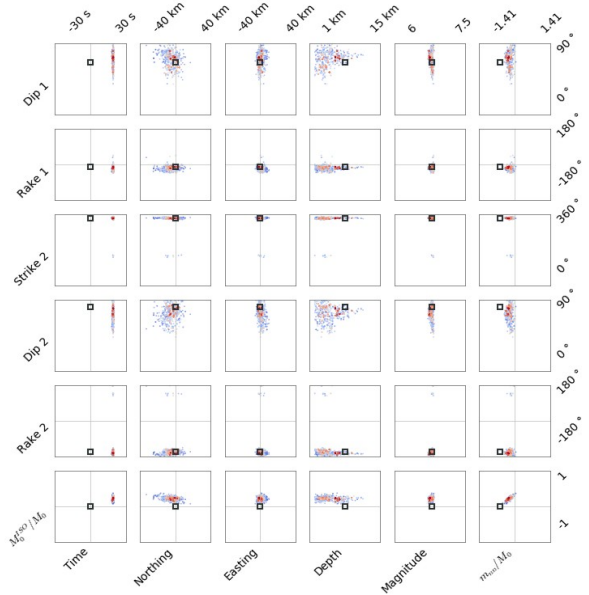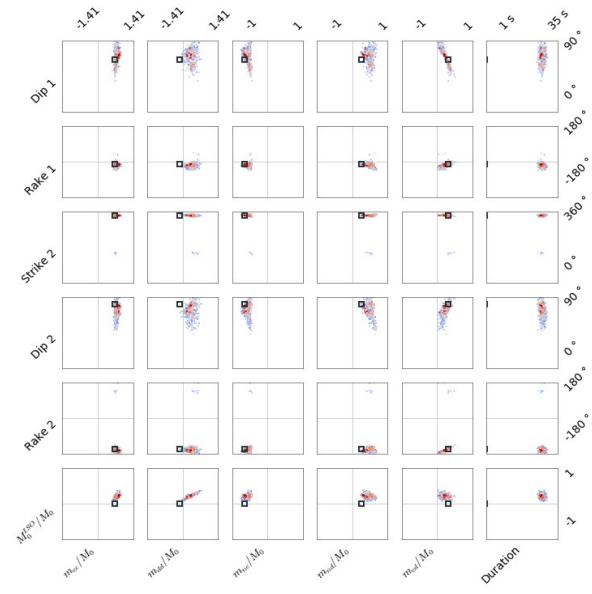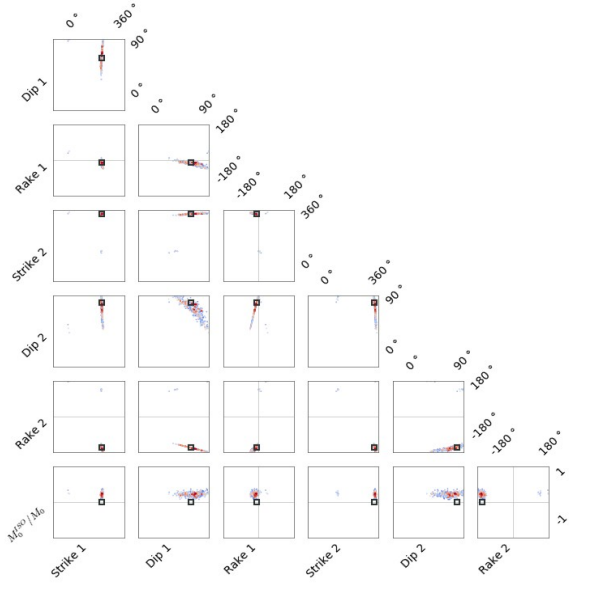

Figure S11. Source parameter's scatter plots, to evaluate the resolution of source parameters and possible trade-offs between pairs of model parameters. The point color indicates the misfit for the model solution with blue for high misfit models and red for low misfit models. The plot ranges are defined by the given parameter bounds and shows the model space of the optimization. Dark gray boxes mark reference solution (GCMT).

**Finite fault model using joint inversion of InSAR and strong motions:**

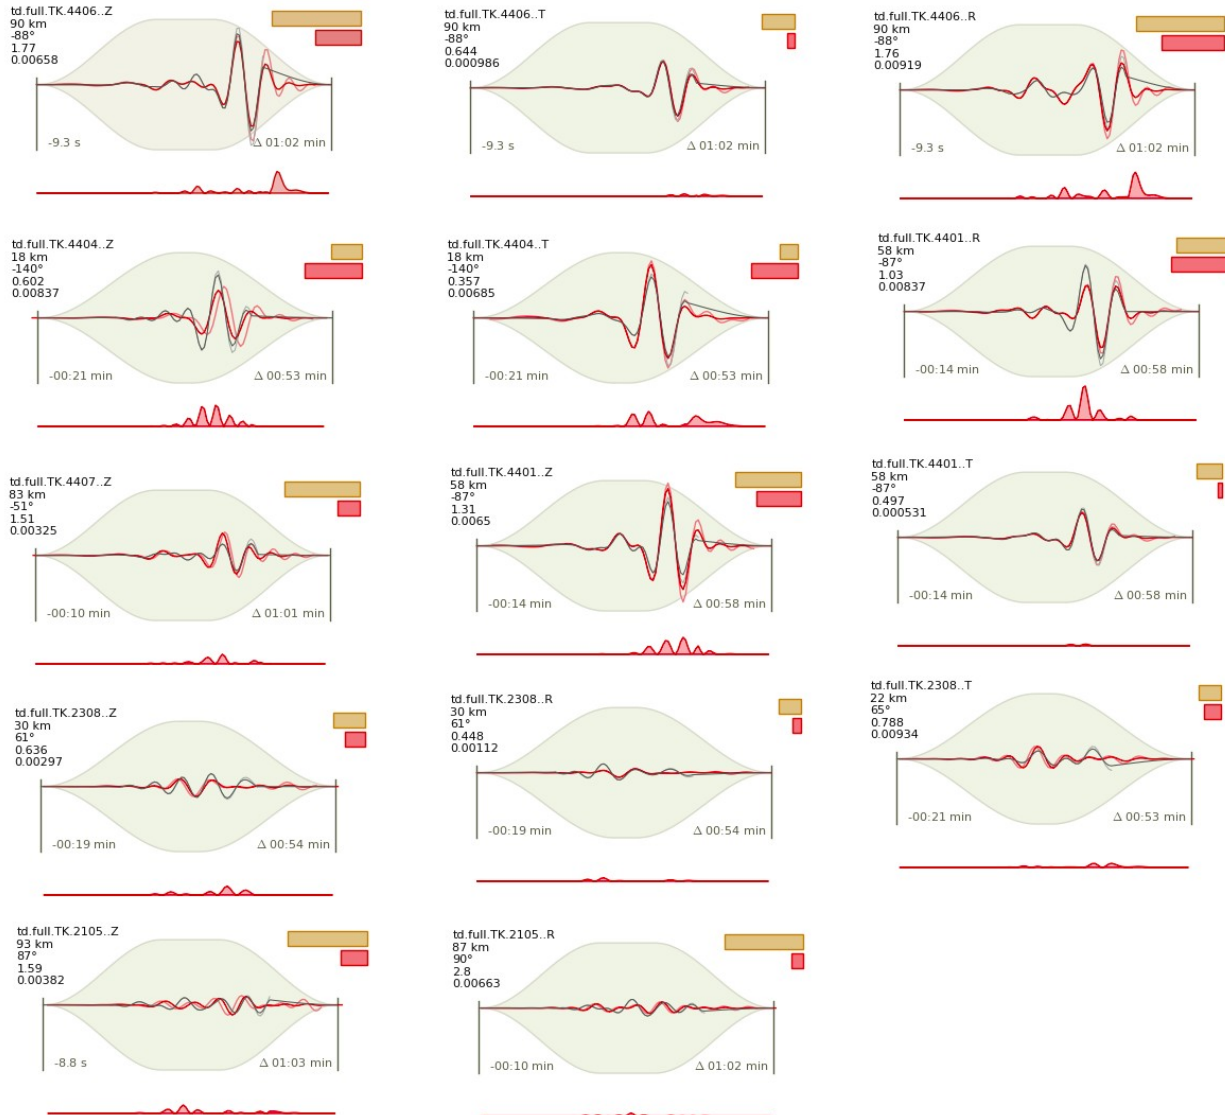

Figure S12. Time domain waveform fits for best model of the strong motion data (full waves: tp.full). For details see caption of Fig. S7.

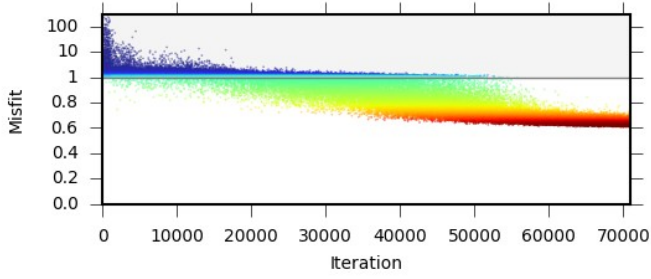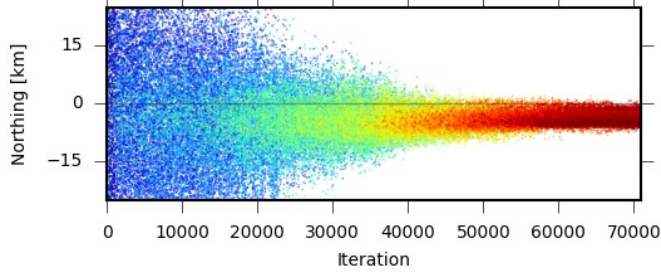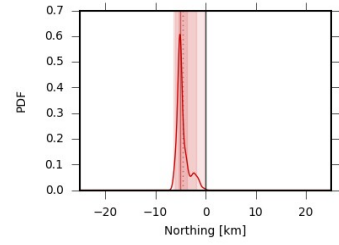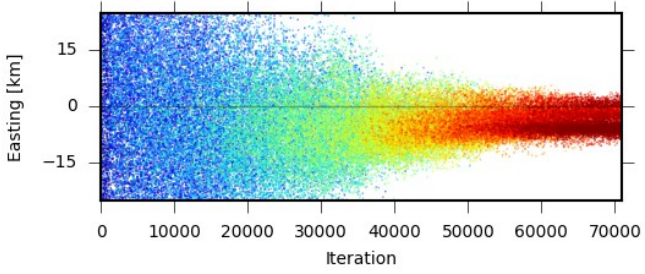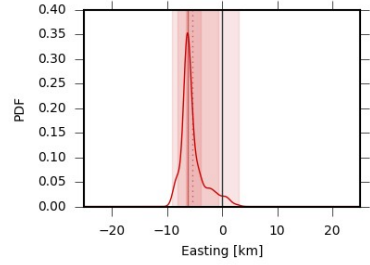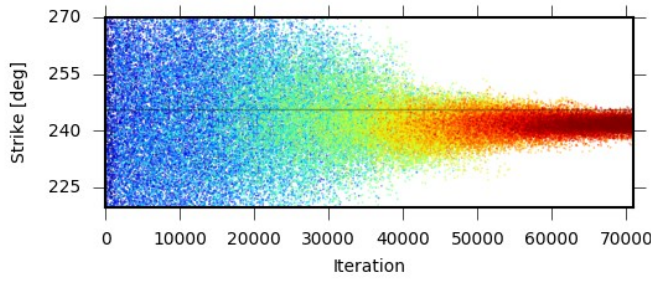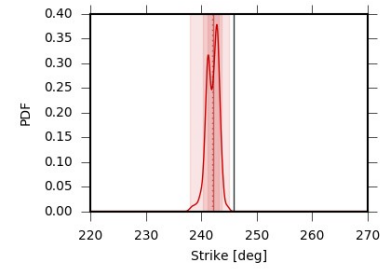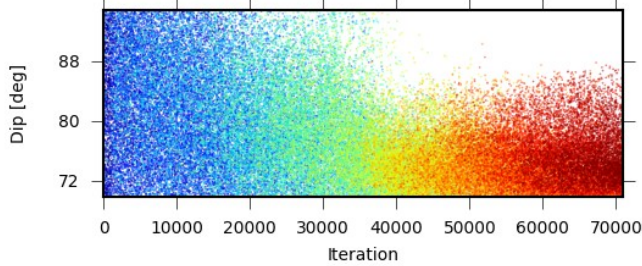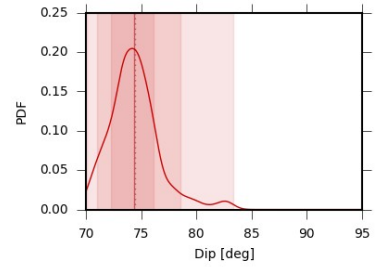

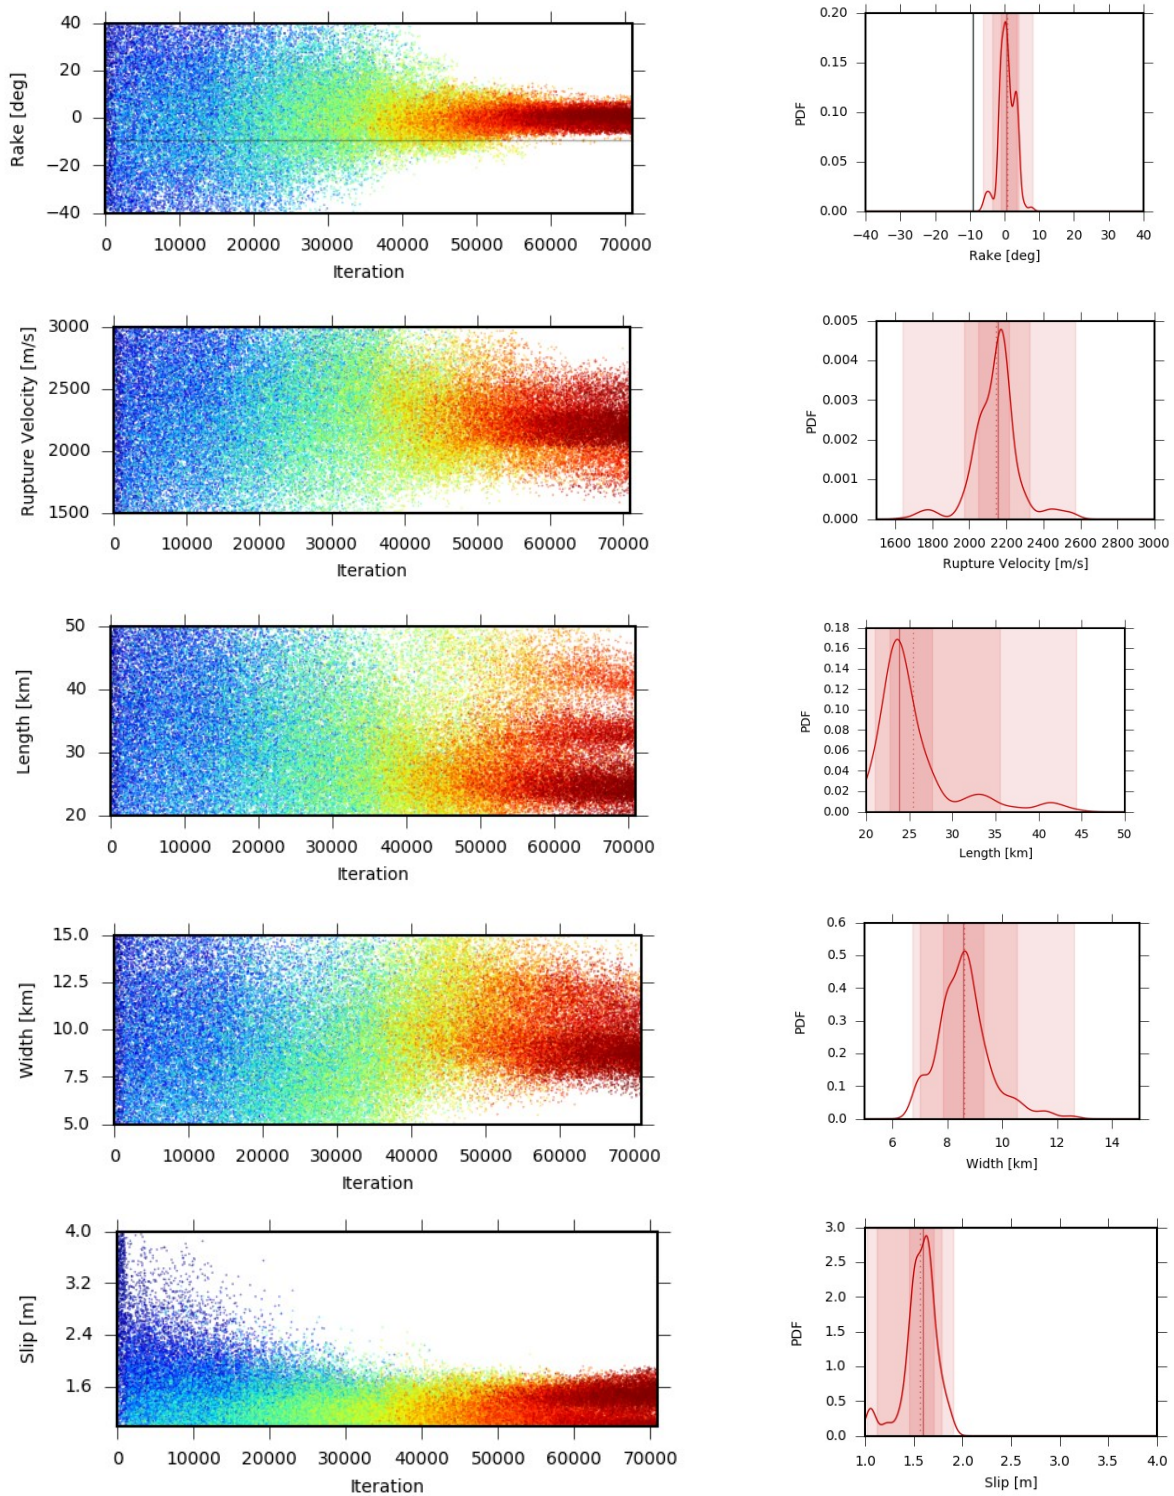

Figure S13. Left: Sequence plot, distribution and uncertainties of the some source parameters of the finite fault model (Slip, dip, rake, strike, width, length and rupture velocity). For details see caption of Fig. S8.

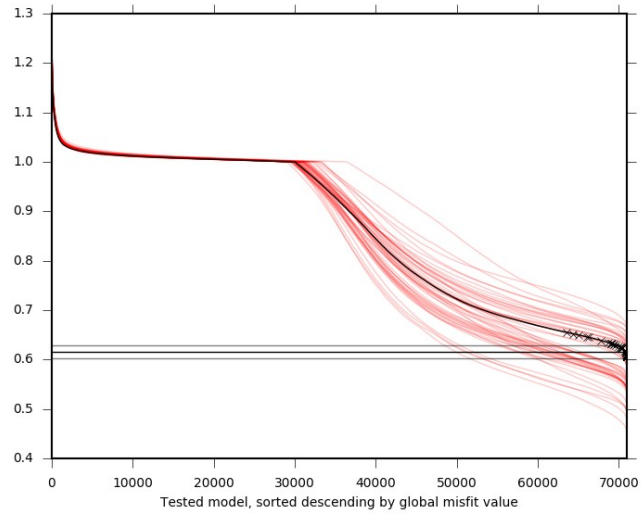

Figure S14. Bootstrap misfit of the optimization in 70000 iterations for the finite fault model. For details see caption of Fig. S9.

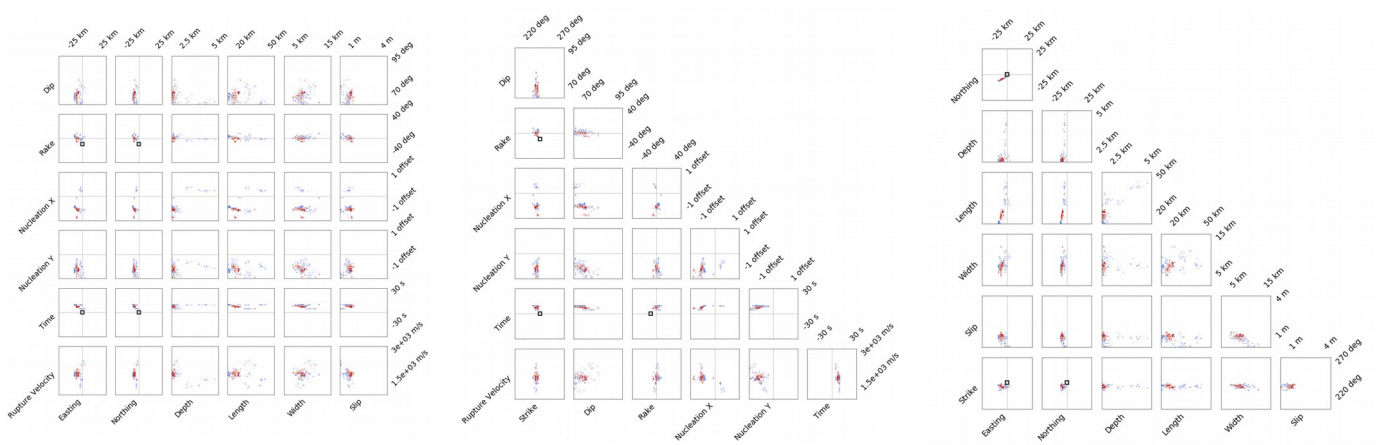

Figure S15. Source parameter's scatter plots, to evaluate the resolution of source parameters in finite fault model and trade-offs between pairs of model parameters. For details see caption of Fig. S11.

## Moment tensor inversion results of the fore and after shocks:

Table S1. Our results of the focal mechanism solutions of fore and after shocks of the 24 January 2020 Elazığ-Sivrice earthquake with comparing to the other agencies. GEOFON: GFZ German Research Center for Geosciences. AFAD: Disaster and Emergency Management Authority Presidential of Earthquake Department. GCMT: Global Centroid Moment Tensor.

| Date             | Time (UTC)  | Source     | Latitude° | Longitude° | Strike1 ° | Dip1 ° | Rake1 ° | Strike2 ° | Dip2 ° | Rake2 ° | Depth (km) | Seismic Moment (N.M) | Mw   |
|------------------|-------------|------------|-----------|------------|-----------|--------|---------|-----------|--------|---------|------------|----------------------|------|
| 4 April 2009     | 17:31:07.00 | AFAD       | 38.3865   | 39.1205    | 345       | 84     | 173     | 76        | 83     | 6       | 9.7        | 6.90E+016            | 5.2  |
|                  |             | GEOFON     | 38.38     | 39.09      | 342       | 86     | 174     | 73        | 84     | 4       | 10         |                      | 5.2  |
|                  |             | GCMT       | 38.35     | 39.06      | 339       | 71     | -173    | 246       | 83     | -20     | 12         | 9.75E+016            | 5.3  |
|                  |             | This study | 38.3865   | 39.1205    | 67.53     | 82.49  | 23.76   | 334.24    | 66.44  | 171.8   | 3.66       | 6.41E+16             | 5.17 |
| 27 December 2019 | 07:02:25.00 | AFAD       | 38.3898   | 39.0158    | 346       | 86     | -139    | 252       | 50     | -6      | 15.1       | 2.53E+016            | 4.9  |
|                  |             | GEOFON     | 38.31     | 39.07      | 345       | 89     | 167     | 75        | 77     | 1       | 14         |                      | 4.8  |
|                  |             | This study | 38.3898   | 39.0158    | 257.16    | 32.72  | 6.45    | 161.72    | 86.51  | 122.56  | 7.76       | 2.45E+16             | 4.89 |
| 25 January 2020  | 00:48:51.00 | AFAD       | 38.4883   | 39.203     | 271       | 68     | 2       | 180       | 88     | 158     | 9.2        | 1.80E+013            | 4.3  |
|                  |             | This study | 38.4883   | 39.203     | 239.7     | 34.33  | -61.3   | 26.16     | 60.34  | -108.16 | 5.98       | 2.02E+15             | 4.17 |
| 25 January 2020  | 06:07:33.00 | AFAD       | 38.3848   | 39.0368    | 336       | 80     | -158    | 242       | 69     | -10     | 8.2        | 2.15E+15             | 4.2  |
|                  |             | This study | 38.3848   | 39.0368    | 244.83    | 48.28  | -7.97   | 340.15    | 84.05  | -138    | 5.55       | 2.08E+15             | 4.17 |
| 25 January 2020  | 08:40:03.00 | AFAD       | 38.479    | 39.2895    | 246       | 67     | -9      | 339       | 81     | -157    | 10.1       | 2.32E+013            | 4.5  |
|                  |             | This study | 38.479    | 39.2895    | 61.27     | 69.68  | 6.81    | 328.89    | 83.61  | 159.55  | 17.83      | 3.08E+15             | 4.29 |
| 25 January 2020  | 10:14:56.00 | AFAD       | 38.276    | 38.753     | 245       | 81     | -21     | 338       | 68     | -169    | 11.5       | 2.16E+013            | 4.4  |
|                  |             | This study | 38.276    | 38.753     | 238.11    | 78.65  | -65.18  | 351.15    | 27.13  | -154.45 | 3.32       | 7.05E+15             | 4.53 |
| 25 January 2020  | 16:30:07.00 | AFAD       | 38.374    | 39.131     | 244       | 58     | -7      | 338       | 84     | -148    | 12.4       | 3.03E+016            | 5    |
|                  |             | GEOFON     | 38.36     | 39.2       | 327       | 80     | 167     | 59        | 78     | 11      | 10         |                      | 5.1  |
|                  |             | This study | 38.374    | 39.131     | 58.61     | 77.24  | 18.02   | 324.5     | 72.43  | 166.6   | 6.72       | 3.31E+16             | 4.97 |
| 26 January 2020  | 02:22:45.00 | AFAD       | 38.244    | 38.8013    | 324       | 89     | 176     | 54        | 86     | 1       | 7.2        | 2.87E+013            | 4.5  |
|                  |             | This study | 38.244    | 38.8013    | 233.54    | 78.04  | -17.69  | 327.32    | 72.7   | -167.47 | 3.7        | 5.64E+15             | 4.46 |
| 27 January 2020  | 16:12:00.00 | AFAD       | 38.395    | 39.1333    | 165       | 84     | -172    | 75        | 82     | -6      | 11.94      | 2.69E+013            | 4.3  |
|                  |             | This study | 38.395    | 39.1333    | 248.13    | 82.61  | -35.55  | 343.38    | 54.78  | -170.94 | 2.95       | 3.80E+15             | 4.35 |
| 31 January 2020  | 23:32:49.00 | AFAD       | 38.4916   | 39.3286    | 212       | 85     | -14     | 303       | 76     | -175    | 17.1       | 1.44E+016            | 4.6  |
|                  |             | This study | 38.4916   | 39.3286    | 304.09    | 72.7   | -151.25 | 204.83    | 62.66  | -19.55  | 10.21      | 9.17E+15             | 4.6  |
| 1 February 2020  | 00:03:49.00 | AFAD       | 38.4511   | 39.2505    | 53        | 83     | -10     | 144       | 80     | -173    | 11.1       | 2.90E+013            | 4.3  |
|                  |             | This study | 38.4511   | 39.2505    | 58.72     | 77.07  | -23.77  | 154.34    | 66.85  | -165.92 | 4.29       | 2.11E+15             | 4.18 |
| 3 February 2020  | 22:19:40.00 | AFAD       | 38.3986   | 39.1543    | 240       | 85     | 22      | 148       | 69     | 175     | 10.2       | 7.78E+014            | 4.6  |
|                  |             | GEOFON     | 38.39     | 39.1       | 336       | 72     | -177    | 246       | 88     | -17     | 10         |                      | 4.5  |
|                  |             | This study | 38.3986   | 39.1543    | 64.24     | 59.18  | -6.99   | 157.83    | 83.99  | -149    | 3.7        | 7.36E+15             | 4.54 |
| 17 February 2020 | 11:42:13.00 | AFAD       | 38.396    | 39.115     | 155       | 89     | -174    | 65        | 84     | -1      | 9.1        | 3.92E+014            | 4.3  |
|                  |             | This study | 38.396    | 39.115     | 66.73     | 62.47  | -5.61   | 159.33    | 85.02  | -152.35 | 5.89       | 3.76E+15             | 4.35 |
| 25 February 2020 | 23:03:36.00 | AFAD       | 38.3291   | 38.7696    | 245       | 43     | -15     | 346       | 80     | -132    | 9.1        | 3.19E+017            | 5    |
|                  |             | GEOFON     | 38.27     | 38.84      | 230       | 39     | -30     | 345       | 71     | -124    | 10         | 2.90E+16             | 4.9  |
|                  |             | This study | 38.3291   | 38.7696    | 241.79    | 30.71  | -14.49  | 344.33    | 82.65  | -119.91 | 12.1       | 3.08E+16             | 4.95 |
| 27 February 2020 | 02:48:45.00 | AFAD       | 38.2525   | 38.6566    | 346       | 59     | -136    | 229       | 54     | -40     | 12.1       | 2.97E+016            | 4.3  |
|                  |             | This study | 38.2525   | 38.6566    | 233.46    | 22.98  | -27.28  | 348.86    | 79.68  | -110.65 | 6.88       | 3.12E+015            | 4.29 |
| 29 February 2020 | 12:29:46.00 | This study | 38.4421   | 39.2356    | 239.88    | 76.34  | -13.05  | 333.01    | 77.32  | -165.99 | 3.94       | 5.14E+015            | 4.44 |
| 19 March 2020    | 17:53:31.00 | AFAD       | 38.372    | 39.1041    | 75        | 82     | -6      | 165       | 84°    | 172     | 7.3        | 3.01947E+017         | 5    |
|                  |             | GEOFON     | 38.38     | 39.01      | 69        | 77     | -4      | 160       | 85     | -167    | 10         |                      | 5.1  |
|                  |             | This study | 38.372    | 39.1041    | 66        | 70     | 4       | 335       | 86.4   | 160     | 5.58       | 4.06643E+016         | 5.04 |

## Reference:

Basili, R., Kastelic, V., Demircioglu, M. B., Garcia Moreno D., et al.: The European Database of Seismogenic Faults (EDSF) compiled in the framework of the Project SHARE. <http://diss.rm.ingv.it/share-edsf/>, doi: 10.6092/INGV.IT-SHARE-EDSF, 2013.

Disaster and Emergency Management Authority Presidential of Earthquake Department (AFAD), <https://depem.afad.gov.tr>, last access: 31 March 2020.

GEOFON Data Centre of Deutsches GeoForschungsZentrum GFZ. <https://doi.org/10.14470/tr560404>, Last access: 31 march 2020.

Global Centroid Moment Tensor (GCMT), <https://www.globalcmt.org/>, Last access: 31 march 2020.

Heimann, S., Isken, M., Kühn, D., Sudhaus, H., Steinberg, A., Vasyura-Bathke, H., Daout, S., Cesca, S., and Dahm, T.: Grond – A probabilistic earthquake source inversion framework, GFZ Data Services, <https://doi.org/10.5880/GFZ.2.1.2018.003>, 2018.
